# Supplementary material
Source: PubMed Central journal article supplement (PMC6652772)
Supplement: IAI.00410-19-s0001.pdf [file IAI.00410-19-s0001.pdf]

**Table S1: Bacterial strains used in this study**

| <b>Wildtype strain and isogenic mutants</b> | <b>Characteristics</b>                   | <b>Plasmid</b>                     | <b>Resistance</b> | <b>Reference</b> |
|---------------------------------------------|------------------------------------------|------------------------------------|-------------------|------------------|
| <i>Nm</i> 8013 (clone12)                    | <i>Nm</i> 8013 (clone12) wild type       | -                                  | -                 | (3)              |
| <i>Nm</i> 8013 GFP                          | GFP expressing mutant of <i>Nm</i> 8013  | pEG2-GFP-Erm <sup>R</sup>          | Erythromycin      | This study       |
| <i>Nm</i> 8013Δ <i>pilE</i>                 | PilE deficient mutant of <i>Nm</i> 8013  | <i>pTL1-pilE-Spec<sup>R</sup></i>  | Spectinomycin     | This study       |
| <i>Nm</i> 8013Δ <i>pilC1</i>                | PilC1 deficient mutant of <i>Nm</i> 8013 | <i>pTL1-pilC1-Spec<sup>R</sup></i> | Spectinomycin     | This study       |
| <i>Nm</i> 8013Δ <i>pilC2</i>                | PilC2 deficient mutant of <i>Nm</i> 8013 | <i>pTL1-pilC2-Spec<sup>R</sup></i> | Spectinomycin     | This study       |

*Nm* = *Neisseria meningitidis*
