# Supplementary material
Source: PubMed Central journal article supplement (PMC6652772)
Supplement: IAI.00410-19-s0002.pdf [file IAI.00410-19-s0002.pdf]

**Table S2. Oligonucleotides used in this study**

| Oligonucleotides       | Sequence <sup>a</sup> (5'-3')              | Localization <sup>b</sup> | Restriction site |
|------------------------|--------------------------------------------|---------------------------|------------------|
| <i>pilC1_EcoRI_F</i>   | CCG <u>gaattc</u> CAGTAAATACGCTATTATC      | 1952796 - 1952814         | <i>EcoRI</i>     |
| <i>pilC1_XbaI_R</i>    | CCG <u>tctaga</u> TTTCAATATCCGACTTAT       | 1953907 - 1953890         | <i>XbaI</i>      |
| <i>pilC1_invF</i>      | CGG <u>cctagg</u> CGCCAAACTGCACCTGC        | 1953462 - 1953478         | <i>AvrII</i>     |
| <i>pilC1_invR</i>      | CGG <u>cctagg</u> CCCGCATTTTTTACCAAG       | 1953206 - 1953189         | <i>AvrII</i>     |
| <i>pilC2_EcoRI_F</i>   | CGG <u>gaattc</u> CCTATCCATACGTTATTG       | 44683 - 44700             | <i>EcoRI</i>     |
| <i>pilC2_XbaI_R</i>    | CGG <u>tctaga</u> TTTTAATCTGCGTATCAC       | 45831 - 45814             | <i>XbaI</i>      |
| <i>pilC2_invF</i>      | CGG <u>cctagg</u> GTCTTTTATCTGAACGCC       | 45372 - 45389             | <i>AvrII</i>     |
| <i>pilC2_invR</i>      | CGG <u>cctagg</u> TATATATCCAGCTTGCCG       | 45118 - 45101             | <i>AvrII</i>     |
| <i>pilE_Xho_F</i>      | GCGCGC <u>cctcgag</u> ATGAACACCCTTCAAAAAGG | 17495 - 17476             | <i>XhoI</i>      |
| <i>pilE_Xba_R</i>      | GCGCGC <u>tctaga</u> TTAGCTGGCAGATGAATC    | 16989 - 17006             | <i>XbaI</i>      |
| <i>pilE_inv_F</i>      | CTGTGG <u>cctagg</u> CGTCAAAACGGTTCGGTC    | 17144 - 17127             | <i>AvrII</i>     |
| <i>pilE_inv_R</i>      | ACGGCT <u>cctagg</u> TGACCTTCAGCCAAAAGG    | 17347 - 17364             | <i>AvrII</i>     |
| <i>pilC1_exp_F</i>     | ACTTGTCTATAAAACCCG                         | 1953150 - 1953167         |                  |
| <i>pilC1_exp_in_R</i>  | CCCAAGGAAATATCGCGG                         | 1953419 - 1953402         |                  |
| <i>pilC1_exp_out_R</i> | GGTGATATCTTTAATCCC                         | 1953507 - 1953490         |                  |
| <i>pilC2_exp_F</i>     | AACCCAATTTACCTTCGG                         | 45056 - 45073             |                  |
| <i>pilC2_exp_in_R</i>  | GTATGGGCTTTGCGCACC                         | 45290 - 45273             |                  |
| <i>pilC2_exp_out_R</i> | ACTGTTATGCCTTGCGCG                         | 45445 - 45428             |                  |
| <i>pilE_exp_F</i>      | GGTTTTACCCTTATCGAGCT                       | 17477 - 17458             |                  |
| <i>pilE_exp_R</i>      | GGATGGCTTCGGAAACTTG                        | 17363 - 17381             |                  |

<sup>a</sup>restriction sites are underlined, <sup>b</sup>coordinates according to genome annotation from (4).
