# Supplementary material
Source: PubMed Central journal article supplement (PMC6652772)
Supplement: IAI.00410-19-s0003.pdf [file IAI.00410-19-s0003.pdf]

**Figure S1**

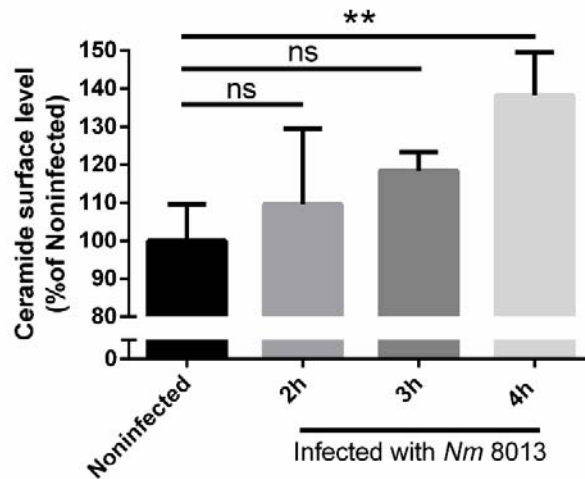

**Supplementary Fig. 1: Ceramide surface level peaked after 4 h post infection.** HBMEC were seeded on a IBIDI treated IBIDI slide and allowed to grow until the next day. Then, cells were infected with *Nm* 8013 for 2, 3 or 4 h with an MOI of 100. Afterwards cells were washed, fixed in paraformaldehyde (FA) and stained with an anti-ceramide antibody and secondary Cy5-conjugated goat anti-mouse IgM. Surface ceramide levels were determined by flow cytometry and data are represented as relative levels of ceramides on the host cell surface. Error bars represent mean  $\pm$  SD. One-way ANOVA with Dunnett's *post hoc* test was used to determine significance. \*\*  $P < 0.01$ ; ns = not significant.
