# Supplementary material
Source: PubMed Central journal article supplement (PMC6652772)
Supplement: IAI.00410-19-s0004.pdf [file IAI.00410-19-s0004.pdf]

Figure S2

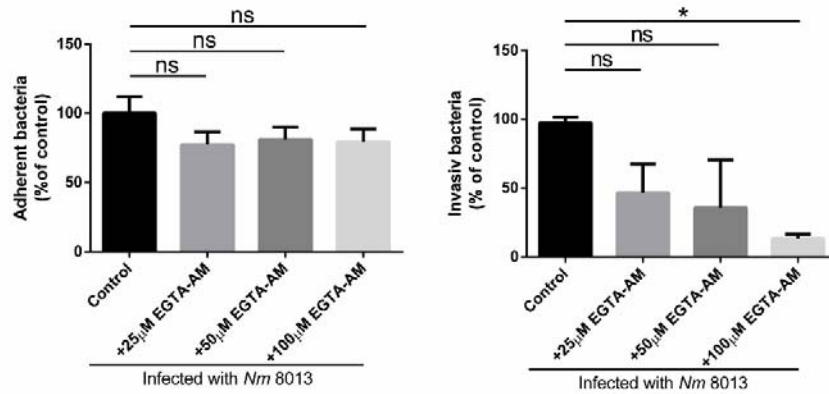

**Supplementary Fig. 2: Depletion of  $\text{Ca}^{2+}$  level interferes with invasion of *N. meningitidis* strain 8013 into HBMEC determined by gentamicin protection assay.** HBMEC were pretreated with different concentrations (25, 50, 100  $\mu\text{M}$ ) of the intracellular calcium chelator EGTA-AM. Afterwards cells were infected for 4 h with an MOI of 100 and adhesion (left panels) and invasion (right panels) was determined by gentamicin protection assay. All results show the mean  $\pm$  SD of three independent experiments performed in duplicate. \*  $P < 0.05$ , relative to untreated control cells by ordinary one-way ANOVA with Dunnett's *post hoc* test. ns, not significant.
