# Supplementary material
Source: PubMed Central journal article supplement (PMC6652772)
Supplement: IAI.00410-19-s0006.pdf [file IAI.00410-19-s0006.pdf]

Figure S4

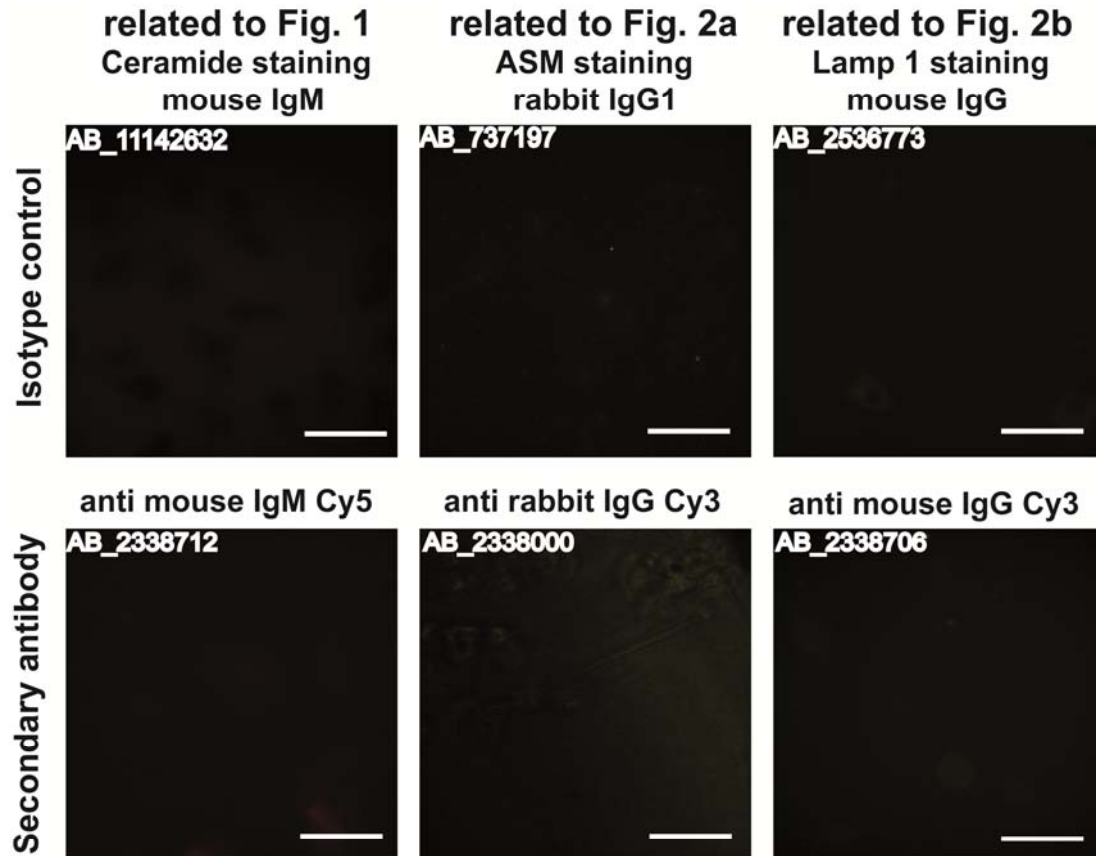

**Supplementary Fig. 4: Isotype and secondary controls to the corresponding immunofluorescence pictures.** Cells were grown over night on IBIDI treated IBIDI slides. Afterwards, cells were fixed with FA and stained for 45 min at RT with either a mouse IgM isotype control (related to Fig.1), a rabbit IgG isotype control (related to Fig. 2A), or a mouse IgG1 isotype control (related to Fig. 2B). Afterwards, cells were washed 3 times with PBS and were incubated for 45 min with either an anti-mouse IgM Cy5, an anti-rabbit IgG Cy3 or an anti-mouse IgG Cy3 secondary antibody. For the control of secondary antibodies, cells were incubated with the indicated secondary antibodies only. Scale bar 100  $\mu$ m.
